# Supplementary material for: SMRT Sequencing Enables High-Throughput Identification of Novel AAVs from Capsid Shuffling and Directed Evolution
Source: MDPI journal article supplement (doi:10.3390/genes14081660), 2023-08-21
Supplement: s1 [file s1]

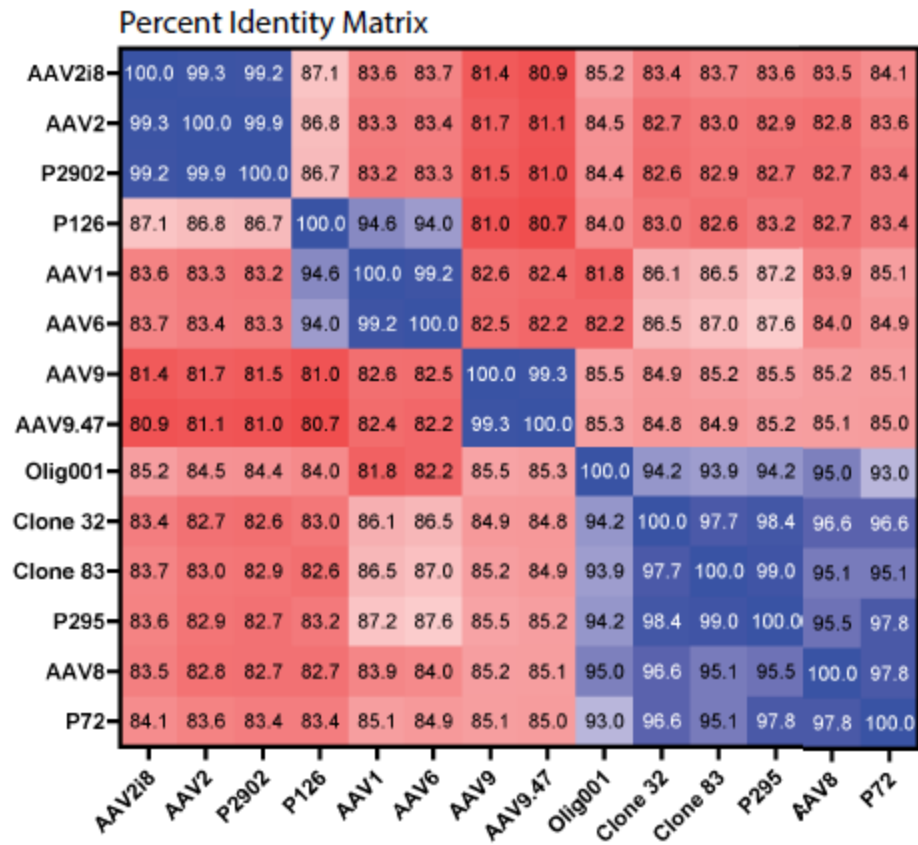

**Figure S1. Percent identity matrix of parent and select lead candidates.** Heatmap shows a percent identity after pairwise sequence alignment of each parent and lead candidate capsid.
